# Supplementary material for: New donor–π–acceptor sensitizers containing 5H-[1,2,5]thiadiazolo [3,4-f]isoindole-5,7(6H)-dione and 6H-pyrrolo[3,4-g]quinoxaline-6,8(7H)-dione units
Source: Royal Society of Chemistry journal article supplement (doi:10.1039/c3cc00060e), 2013-01-01

## **New donor- $\pi$ -acceptor sensitizers containing 5H-[1,2,5]thiadiazolo [3,4-f]isoindole-5,7(6H)-dione and 6H-pyrrolo[3,4-g]quinoxaline-6,8(7H)-dione units**

Hairong Li, Teck Ming Koh, Anders Hagfeldt, Michael Grätzel, Subodh G. Mhaisalkar\* and Andrew C. Grimsdale\*

*School of Materials Science and Engineering, Nanyang Technological University, 50 Nanyang Avenue, 639798 Singapore.*

*Energy Research Institute @ NTU (ERI@N), 50 Nanyang Drive, 637553 Singapore.*

*\*Corresponding Author. Email: subodh@ntu.edu.sg, ACGrimsdale@ntu.edu.sg*

### **Experimental Details**

**Materials and Equipments.** Reactants and reagents appeared in this report, unless otherwise stated, were purchased either from Sigma-Aldrich or Alfa-Aesar, and used without further purification. Column chromatography was carried out with Merck silica (230 – 400 mesh) while thin layer chromatography (TLC) was performed on Merck silica 60 Al-backed plates (20 cm  $\times$  20 cm).  $^1\text{H}$  and  $^{13}\text{C}$  NMR data were obtained on a Bruker DPX 400 MHz spectrometer with chemical shifts referenced to  $\text{CDCl}_3$ . Matrix assisted laser desorption/ionization time-of-flight (MALDI-TOF) mass spectra were obtained on a Shimadzu Biotech AXIMA-TOF<sup>2</sup>. Elemental analysis was obtained via a Thermo Scientific Flash 2000 Series CHNS/O Analyzer. UV-Vis absorption spectra were recorded on a Lambda 900 Spectrometer from Perkin Elmer. Cyclic voltammetry (CV) experiments were performed using a Multichannel Potentiostat (Model

1470E) from Solartron Analytical. All CV measurements were recorded in dichloromethane (DCM) with 0.1 M tetrabutylammonium hexafluorophosphate as supporting electrolyte (scan rate of  $100 \text{ mV}\cdot\text{s}^{-1}$ ). The experiments were performed at room temperature with a conventional three electrode configuration consisting of a platinum wire working electrode, a gold counter electrode, and a Ag/AgCl in 3 M KCl reference electrode. The measured potentials were converted to orbital energies by using value of SCE (saturated calomel electrode) having potential of -4.4 eV relative to vacuum. For the photovoltaic measurements, the solar cells having  $0.16 \text{ cm}^2$  active area were measured with  $0.25 \text{ cm}^2$  metal mask using solar simulator (San-EI Electric, XEC-301S) under AM 1.5G standard. J-V characteristics were recorded by applying external potential bias while measuring the current response with a Keithley 2612A SourceMeter. For electrochemical impedance spectroscopy study, measurements were carried out using AutoLab PGSTAT302N under illumination condition and different bias potentials were applied ranging from 0.05 V to open-circuit voltage and frequencies between 1MHz and 0.1 Hz. Incident photon current efficiency studies was carried out using PVE300 from Bentham, with dual Xenon/quartz halogen light source, measured in DC mode.

**DSC Device Fabrication.** After being cleaned with soap solution, a fluorine-doped tin oxide (FTO) glass plate was immersed in aqueous 0.04 M  $\text{TiCl}_4$  solution at  $70^\circ \text{C}$  for 30 min and washed with deionized water and ethanol. Nanocrystalline  $\text{TiO}_2$  paste was coated on top of the

FTO glass by manual screen printing method. Two transmission layers (18 nm particle size and 3  $\mu\text{m}$  thickness per layer) and two reflection layers (150 nm particle size and 3  $\mu\text{m}$  thickness per layer) were printed in sequence with 6 min relaxation time in between. The 2+2  $\text{TiO}_2$  coated FTO glass was sintered following the programme shown in the table below:

|                              | <b>Step 1</b> | <b>Step 2</b> | <b>Step 3</b> | <b>Step 4</b> | <b>Step 5</b> |
|------------------------------|---------------|---------------|---------------|---------------|---------------|
| Ramp time (mins)             | 15            | 15            | 5             | 10            | 10            |
| Temp (degC)                  | 125           | 325           | 375           | 450           | 500           |
| <i>Stabilize time (mins)</i> | 10            | 5             | 5             | 15            | 15            |

The sintered FTO glass plate was immersed in aqueous 0.04 M  $\text{TiCl}_4$  solution at 70 ° C for 30 min and washed with deionized water and ethanol. The prepared  $\text{TiO}_2$  electrodes were immersed into dye solutions (0.5 mM in a mixture of tetrahydrofuran (THF) and tert-butanol (v/v 8/2), and kept at room temperature for 12 hours. Counterelectrodes were prepared by drilling a hole on the FTP glass followed by coating a drop of  $\text{H}_2\text{PtCl}_6$  solution and heating at 400 °C for 15 min. The dye-adsorbed  $\text{TiO}_2$  electrode and Pt counterelectrode were assembled and sealed with a Surlyn film under a hot-press. The cell was filled with a drop of the electrolyte comprising of 1.0 M 1,3-dimethylimidazolium iodide (DMII), 0.05 M LiI, 0.03 M  $\text{I}_2$ , 0.5 M 4-tert-butylpyridine (TBP), 0.1 M guanidiniumthiocyanate (GuSCN) in acetonitrile : valeronitrile (v/v 85/15) by means of

vacuum backfilling. The hole was quickly sealed with the a Surlyn film covered with glass.

Finally, the contacts were soldered with Sn metal at 290 °C and 60 kHz.

### Synthetic Details.

**4,7-Dibromo-benzo[c][1,2,5]thiadiazole-N-2-ethylhexyl-5,6-imide (1).** N-ethylhexyl-5,6-diaminoisoindoline (1.2 g, 3.48 mmol), and bromine (0.45 ml, 8.7 mmol) were dissolved in chloroform (60 mL). The reaction solution was stirred for 1 h followed by adding thionylchloride dropwise (1.0 mL, 13.9 mmol) and then triethylamine dropwise (2.9 mL, 20.1 mmol). The reaction mixture was heated to 50 °C for 1 d, cooled down and poured into ice water, then extracted with dichloromethane (DCM). The organic layer was collected, washed with water, dried over anhydrous MgSO<sub>4</sub>, and concentrated. The residue was purified by chromatography, eluting with hexane/DCM (1/2) to obtain a white solid (1.17 g, 63%). <sup>1</sup>H NMR (CDCl<sub>3</sub>, δ ppm): 3.64 (d, 2H, J = 7.2, NCH<sub>2</sub>), 1.87 (quintet, 1H, J = 6.4 Hz, NCH<sub>2</sub>CH), 1.27-1.37 (m, 8H, CH<sub>2</sub>), 0.85-0.92 (m, 6H, J = 6.8 Hz, CH<sub>3</sub>). <sup>13</sup>C NMR (CDCl<sub>3</sub>, δ ppm): 166.7, 157.2, 133.7, 130.8, 43.5, 38.7, 31.3, 29.2, 24.6, 23.7, 14.7, 11.1. MALDI-TOF-MS m/z: 474.93 (M<sup>+</sup>, 100 %); calcd. for C<sub>16</sub>H<sub>17</sub>Br<sub>2</sub>N<sub>3</sub>O<sub>2</sub>S: 474.94. Anal.: calcd. for C<sub>16</sub>H<sub>17</sub>Br<sub>2</sub>N<sub>3</sub>O<sub>2</sub>S: C, 40.44; H, 3.61; N, 8.84; S, 6.75; found: 40.27; H, 3.65; N, 9.10; S, 6.63.

**4,7-Dithien-2-yl-benzo[c][1,2,5]thiadiazole-N-2-ethylhexyl-5,6-imide (2).** Compound **1**

(1 g, 2.10 mmol), 2-(tributylstannyl)thiophene (1.54 mL, 4.84 mmol) and  $(\text{PPh}_3)_2\text{Pd}(\text{II})\text{Cl}_2$  (90 mg, 0.13 mmol) were dissolved in THF (25 mL) under an inert atmosphere. The reaction was stirred under reflux overnight, cooled down and poured into water, then extracted with DCM. The organic layer was collected, washed with water and dried over anhydrous  $\text{MgSO}_4$  and concentrated. The residue was purified by chromatography, eluting with hexane/DCM (1/2) to obtain a yellow solid (0.92 g, 91%).  $^1\text{H}$  NMR ( $\text{CDCl}_3$ ,  $\delta$  ppm): 7.89 (dd, 2H, J = 4 Hz, ThH), 7.71 (dd, 2H, J = 4 Hz, ThH), 7.26-7.29 (m, 2H, ThH), 3.63 (d, 2H, J = 7.2,  $\text{NCH}_2$ ), 1.89 (quintet, 1 H, J = 6.4 Hz,  $\text{NCH}_2\text{CH}$ ), 1.27-1.36 (m, 8H,  $\text{CH}_2$ ), 0.85-0.92 (m, 6H, J = 6.8 Hz,  $\text{CH}_3$ ).  $^{13}\text{C}$  NMR ( $\text{CDCl}_3$ ,  $\delta$  ppm): 166.6, 156.7, 134.7, 133.7, 130.5, 127.0, 126.6, 119.3, 43.6, 38.7, 31.3, 29.2, 24.6, 23.7, 14.7, 11.1. MALDI-TOF-MS m/z: 481.08 ( $\text{M}^+$ , 100 %); calcd. for  $\text{C}_{24}\text{H}_{23}\text{N}_3\text{O}_2\text{S}_3$ : 481.10. Anal.: calcd. for  $\text{C}_{24}\text{H}_{23}\text{N}_3\text{O}_2\text{S}_3$ : C, 59.85; H, 4.81; N, 8.72; S, 19.97; found: 59.66; H, 4.97; N, 8.96; S, 19.74.

**N-(2-ethylhexyl)-2,3-diphenyl-5,9-di(thiophen-2-yl)-7H-pyrrolo[3,4-g]quinoxaline-6,8-dione (5).** Compound **2** (0.5 g, 1.04 mmol) dissolved in anhydrous THF (10 mL) was cooled down to 0 °C,  $\text{NaBH}_4$  (156 mg, 4.16 mmol) dissolved in THF (5 mL) was added dropwise. The reaction was stirred at 0 °C for 6 h, poured into ice water and acidified with 1 M HCl to pH~4

and then filtered. The collected bright yellow solid was washed with water, then with MeOH, and dried without further purification. The as prepared solid together with benzil (0.22 g, 1.04 mmol) were dissolved in glacial acetic acid (20 mL). The suspension was heated up to 140 °C for 1 d, cooled down and poured into water, then extracted with DCM. The organic layer was collected, washed with water and dried over anhydrous MgSO<sub>4</sub> and concentrated. The residue was purified by chromatography, eluting with hexane/DCM (1/3) to obtain a yellow solid (0.45 g, overall yield 70%). <sup>1</sup>H NMR (CDCl<sub>3</sub>, δ ppm): 7.97 (d, 2H, J = 4 Hz, ThH), 7.68 (m, 4H, PhH), 7.46 (m, 4H, PhH), 7.29-7.39 (m, 4H, PhH ThH), 7.28 (d, 2H, J = 4.4 Hz, ThH), 7.10 (m, 2H, ThH), 3.62 (d, 2H, J = 6.8 Hz, NCH<sub>2</sub>), 1.75 (t, 1H, J = 6.0 Hz, NCH<sub>2</sub>CH), 1.35-1.49 (m, 8H, CH<sub>2</sub>), 0.91-0.98 (m, 6H, J = 6.8 Hz, CH<sub>3</sub>). <sup>13</sup>C NMR (CDCl<sub>3</sub>, δ ppm): 167.1, 153.7, 141.8, 138.4, 133.4, 133.2, 131.0, 130.9, 130.4, 129.2, 129.0, 127.8, 126.8, 43.4, 38.7, 31.3, 29.2, 24.6, 23.7, 14.7, 11.1. MALDI-TOF-MS m/z: 627.19 (M<sup>+</sup>, 100 %); calcd. for C<sub>38</sub>H<sub>33</sub>N<sub>3</sub>O<sub>2</sub>S<sub>2</sub>: 627.20. Anal.: calcd. for C<sub>38</sub>H<sub>33</sub>N<sub>3</sub>O<sub>2</sub>S<sub>2</sub>: C, 72.70; H, 5.30; N, 6.69; S, 10.21; found: C, 72.42; H, 5.49; N, 6.83, S, 9.96.

**Compound 7.** Compound **2** (150 mg, 0.31 mmol) and N-bromosuccimide (NBS, 116 mg, 0.65 mmol) were dissolved in THF (12 mL) at 0 °C and stirred at r.t. The reaction was monitored by TLC until completion, then poured into water, neutralized with Na<sub>2</sub>S<sub>2</sub>O<sub>3</sub> and

filtered. The solid (compound **3**) was washed with water and vacuum dried, then redissolved in THF (15 mL) and transferred to a 50 mL two-neck round bottom flask, to which the 4-boronic acid-N,N-bis(4-hexyloxyphenyl)aniline (152 mg, 0.31 mmol), Pd(0)(PPh<sub>3</sub>)<sub>4</sub> (22 mg, 0.018 mmol) and K<sub>2</sub>CO<sub>3</sub> (2M aq, 5 ml) were added. The reaction solution was refluxed under an inert atmosphere for 3 h followed by addition of 5-carboxaldehyde-thiophene-2-boronic acid (58 mg, 3.74 mmol) in THF (5 mL) via syringe. The reaction was continued for 1 d, cooled down and cooled down and poured into water, then extracted with DCM. The organic layer was collected, washed with water and dried over anhydrous MgSO<sub>4</sub> and concentrated. The residue was purified by chromatography, eluting with DCM to obtain a purple red solid (190 mg, 58%). <sup>1</sup>H NMR (CDCl<sub>3</sub>, δ ppm): 9.89 (s, 1H, CHO), 8.05 (d, 1H, J = 4 Hz, ThH), 7.89 (d, 1H, J = 4 Hz, ThH), 7.71 (d, 1H, J = 4 Hz, ThH), 7.50 (m, 3H, ThH PhH), 7.38 (d, 2H, J = 4 Hz, ThH), 7.34 (b, 1H, ThH), 7.08 (b, 4H, PhH), 6.92 (b, 2H, PhH), 6.84 (d, 4H, J = 8.0 Hz, PhH), 3.94 (b, 4H, OCH<sub>2</sub>), 3.66 (d, 2 H, J = 7.2 Hz, NCH<sub>2</sub>), 1.89 (t, 1 H, J = 6.0 Hz, NCH<sub>2</sub>CH), 1.78 (quintet, J = 6.8 Hz, 4H, OCH<sub>2</sub>CH<sub>2</sub>), 1.43-1.50 (m, 4H, CH<sub>2</sub>), 1.28-1.36 (m, 16H, CH<sub>2</sub>), 0.86-0.93 (m, 12H, CH<sub>3</sub>). <sup>13</sup>C NMR (CDCl<sub>3</sub>, δ ppm): 183.2, 166.9, 166.8, 156.8, 156.5, 147.1, 143.0, 140.9, 137.9, 136.4, 135.1, 134.1, 130.1, 128.4, 128.0, 127.6, 126.4, 126.1, 125.6, 125.2, 122.4, 120.4, 116.0, 68.9, 43.6, 38.7, 32.3, 31.3, 30.0, 29.2, 26.4, 24.6, 23.7, 23.3, 14.78, 14.76, 11.1. MALDI-TOF-

MS  $m/z$ : 1034.43 ( $M^+$ , 100 %); calcd. for  $C_{59}H_{62}N_4O_5S_4$ : 1034.36. Anal.: calcd. for  $C_{59}H_{62}N_4O_5S_4$ : C, 68.44; H, 6.04; N, 5.41; S, 12.39; found: C, 68.21; H, 6.10; N, 5.57, S, 12.30.

**Compound 8.** Compound **8** was prepared from compound **5** by the same procedure used for making compound **7**, as a bright yellow solid in an overall yield of 60%.  $^1H$  NMR ( $CDCl_3$ ,  $\delta$  ppm): 9.85 (s, 1H, CHO), 7.89 (d, 2H,  $J = 4$  Hz, ThH), 7.82 (d, 4H,  $J = 8.4$  Hz, PhH), 7.72 (m, 2H, PhH), 7.67 (m, 4H, PhH), 7.39-7.48 (m, 3H, ThH), 7.24-7.29 (m, 4H, PhH ThH), 7.08 (d, 4H,  $J = 8.8$  Hz, PhH), 6.92 (d, 2H,  $J = 8.4$  Hz, PhH), 6.83 (d, 4H,  $J = 8.8$  Hz, PhH), 3.94 (t, 4H,  $J = 6.4$  Hz,  $OCH_2$ ), 3.63 (d, 2H,  $J = 6.8$  Hz,  $NCH_2$ ), 1.79 (b, 1H,  $NCH_2CH$ ), 1.74-1.78 (m, 4H,  $CH_2$ ), 1.25-1.46 (m, 20H,  $CH_2$ ), 0.85-0.93 (m, 12H,  $CH_3$ ).  $^{13}C$  NMR ( $CDCl_3$ ,  $\delta$  ppm): 183.0, 166.7, 157.1, 156.5, 148.3, 142.0, 141.7, 140.7, 138.7, 138.1, 136.5, 133.7, 133.1, 132.9, 132.2, 132.1, 131.9, 131.4, 130.8, 129.2, 129.1, 127.65, 127.61, 127.5, 127.2, 127.1, 124.5, 120.4, 119.1, 115.9, 114.1, 68.9, 43.5, 38.6, 32.2, 31.2, 30.3, 29.9, 29.1, 26.4, 24.6, 23.7, 23.3, 14.7, 11.1. MALDI-TOF-MS  $m/z$ : 1180.38 ( $M^+$ , 100 %); calcd. for  $C_{73}H_{72}N_4O_5S_3$ : 1180.46. Anal.: calcd. for  $C_{73}H_{72}N_4O_5S_3$ : C, 74.20; H, 6.14; N, 4.74; S, 8.14; found: C, 73.96; H, 6.23; N, 4.59; S, 7.97.

**L101.** Compound **7** (150 mg, 0.145 mmol), cyanoacetic acid (37 mg, 0.43 mmol) and piperidine (0.1 mL, 1.0 mmol) were dissolved in chloroform (10mL). The solution was refluxed



overnight, cooled down, acidified with 1 M HCl, poured into water then extracted with DCM. The organic layer was collected, washed with water, dried over anhydrous MgSO<sub>4</sub>, and concentrated. The residue was purified by chromatography, eluting with DCM/MeOH (9/1) to obtain **L101** as a black solid (138 mg, 87%). <sup>1</sup>H NMR (CDCl<sub>3</sub>, δ ppm): 7.95 (b, 1H, ThH), 7.40 (d, 2H, J = 8.4 Hz, PhH), 7.19 (b, 1H, ThH), 7.18 (b, 1H, ThH), 7.06 (b, 3H, PhH, ThH), 7.01 (m, 2H, ThH), 6.92 (b, 2H, PhH), 6.83 (b, 5H, PhH ThH), 4.25 (d, 2H, J = 5.6 Hz, NCH<sub>2</sub>), 3.93 (t, 4H, J = 6.4 Hz, OCH<sub>2</sub>), 1.75-1.80 (m, 3H, OCH<sub>2</sub>CH<sub>2</sub>NCH<sub>2</sub>CH), 1.26-1.49 (m, 22H, CH<sub>2</sub>), 0.87-0.99 (m, 12H, CH<sub>3</sub>). <sup>13</sup>C NMR (CDCl<sub>3</sub>, δ ppm): 166.4, 162.9, 156.4, 156.3, 151.4, 149.4, 145.7, 145.4, 141.0, 140.3, 138.6, 136.3, 136.1, 135.2, 133.6, 129.8, 127.6, 127.3, 127.1, 125.8, 125.6, 125.5, 125.3, 124.9, 121.9, 120.0, 115.7, 71.0, 39.8, 36.9, 31.8, 30.9, 29.4, 28.8, 24.2, 23.45, 23.44, 14.54, 14.52, 11.5, 10.9. MALDI-TOF-MS m/z: 1101.39 (M<sup>+</sup>, 100 %); calcd. for C<sub>62</sub>H<sub>63</sub>N<sub>5</sub>O<sub>6</sub>S<sub>4</sub>: 1101.36. Anal.: calcd for C<sub>62</sub>H<sub>63</sub>N<sub>5</sub>O<sub>6</sub>S<sub>4</sub>: C, 67.55; H, 5.76; N, 6.35; S, 11.63; found: 67.46; H, 5.82; N, 6.59; S, 11.44.

**L102.** **L102** was prepared from compound **8** by the same procedure used for making **L101** as a dark red solid in a yield of 85%. <sup>1</sup>H NMR (CDCl<sub>3</sub>, δ ppm): 7.93-8.04 (b, m, 16H, PhH, ThH), 7.83 (d, 4H, J = 8.4 Hz, PhH), 7.77 (d, 2H, J = 4 Hz, ThH), 7.67 (d, 4H, J = 8.4 Hz, PhH), 7.63 (m, 1H, ThH), 7.52-7.55 (m, 2H), 7.30 (b, 1H, ThH), 7.28 (m, 1H, ThH), 7.12 (b, 1H, ThH),

6.76 (b, 12H, ThH, PhH), 4.03 (b, 4H, OCH<sub>2</sub>), 3.64 (d, J = 7.2 Hz, 2H, NCH<sub>2</sub>), 1.84 (b, 4H, OCH<sub>2</sub>CH<sub>2</sub>), 1.68-1.74 (m, 1H, NCH<sub>2</sub>CH), 1.25-1.46 (m, 21H, CH<sub>2</sub>), 0.87-0.90 (m, 12H, CH<sub>3</sub>). <sup>13</sup>C NMR (CDCl<sub>3</sub>, δ ppm): 168.3, 166.7, 156.4, 148.3, 148.1, 147.4, 146.0, 143.8, 142.8, 142.3, 140.7, 137.2, 133.6, 133.4, 130.4, 129.9, 129.3, 128.8, 128.0, 127.7, 127.5, 127.4, 126.7, 126.2, 125.6, 125.1, 123.8, 123.6, 120.4, 115.9, 68.9, 38.7, 35.2, 32.2, 31.2, 30.9, 30.3, 30.0, 29.9, 29.1, 26.4, 23.3, 14.7, 11.1. MALDI-TOF-MS m/z: 1247.55 (M<sup>+</sup>, 100 %); calcd. for C<sub>76</sub>H<sub>73</sub>N<sub>5</sub>O<sub>6</sub>S<sub>3</sub>: 1247.47. Anal.: Calcd. for C<sub>76</sub>H<sub>73</sub>N<sub>5</sub>O<sub>6</sub>S<sub>3</sub>: C, 73.11; H, 5.89; N, 5.61; S, 7.70; found: 72.95; H, 5.93; N, 5.72; S, 7.88.

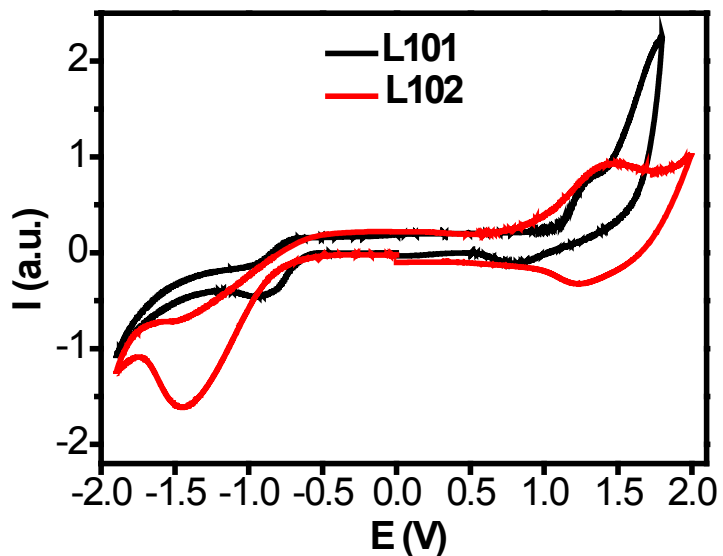

**Figure S1.** Cyclic voltammetry spectra of L101 and L102.

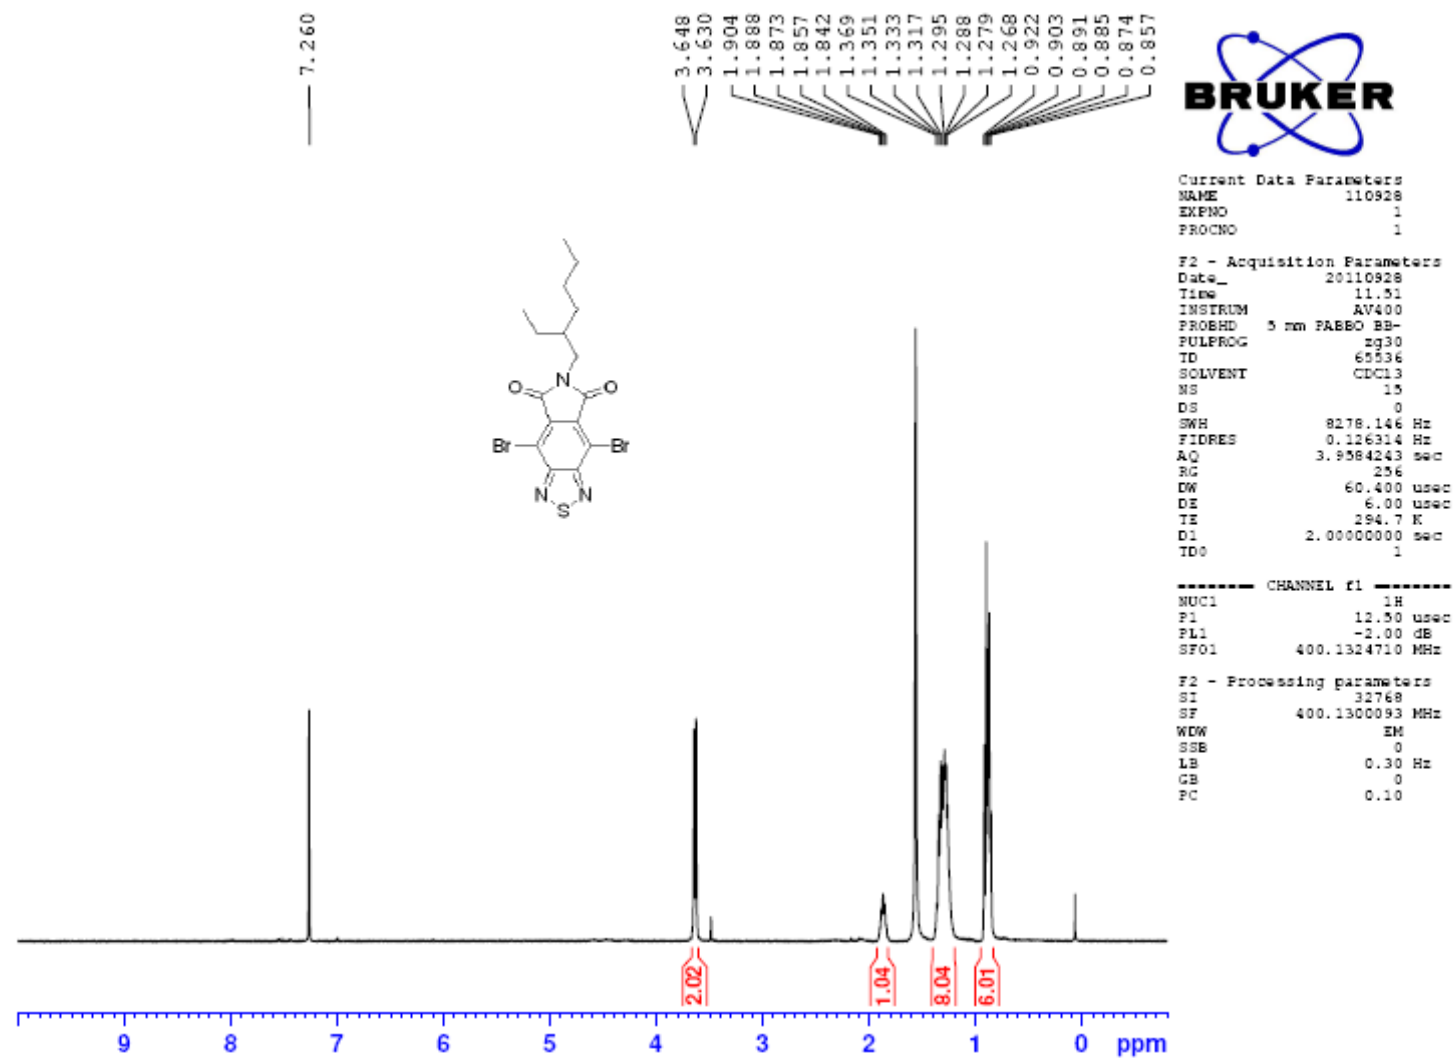

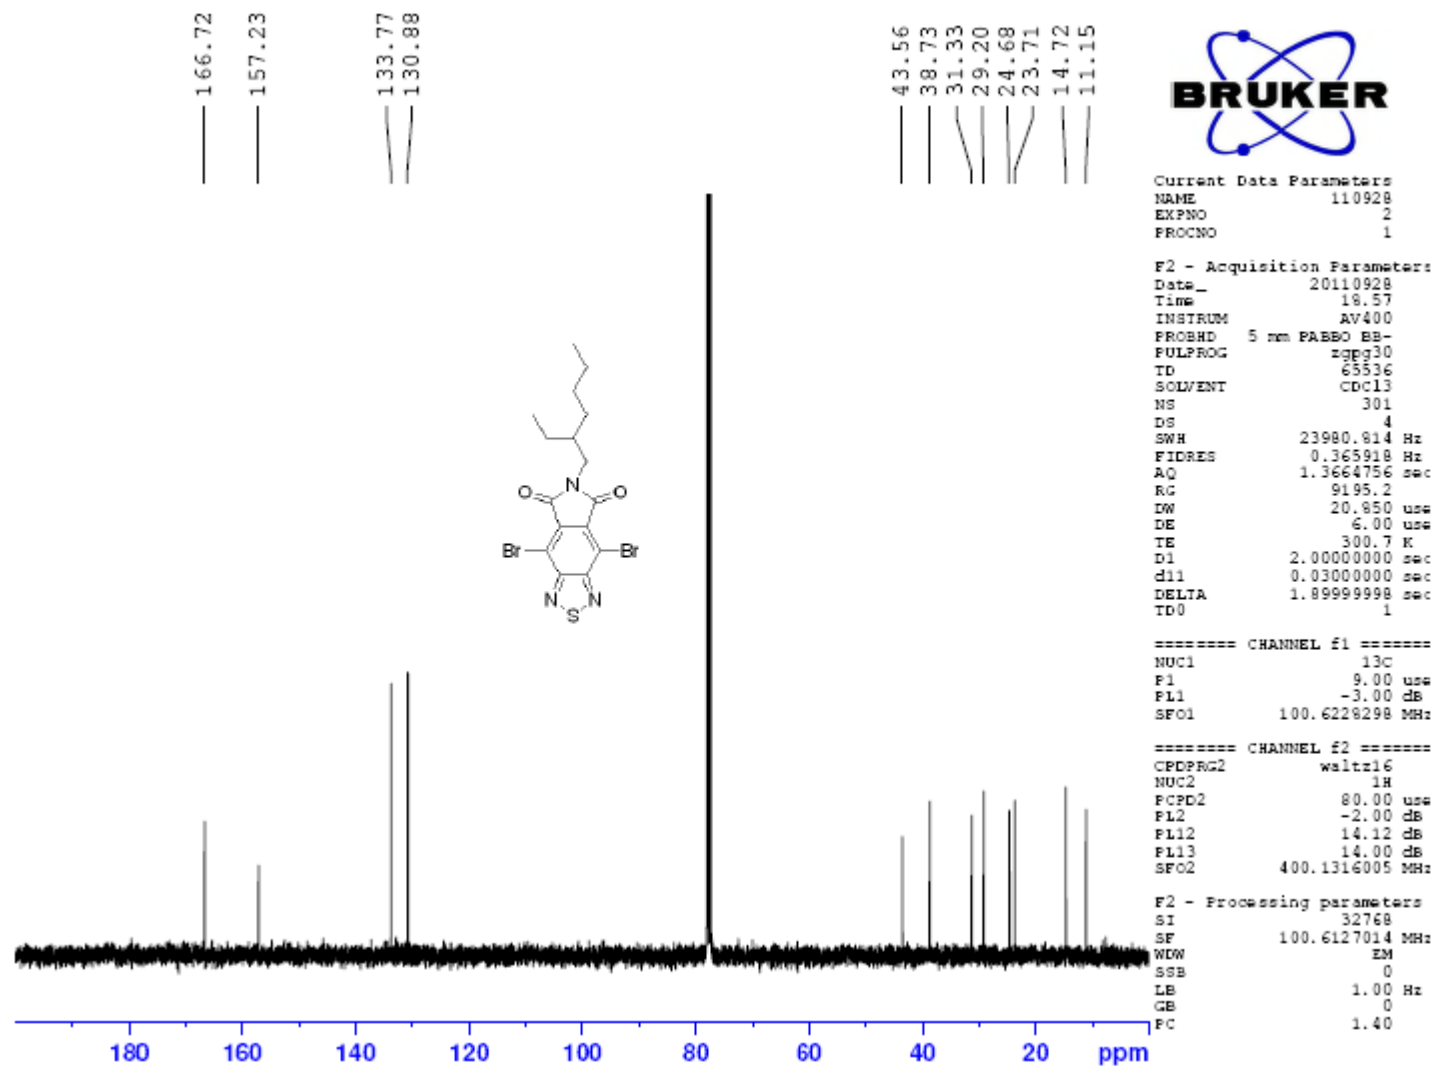

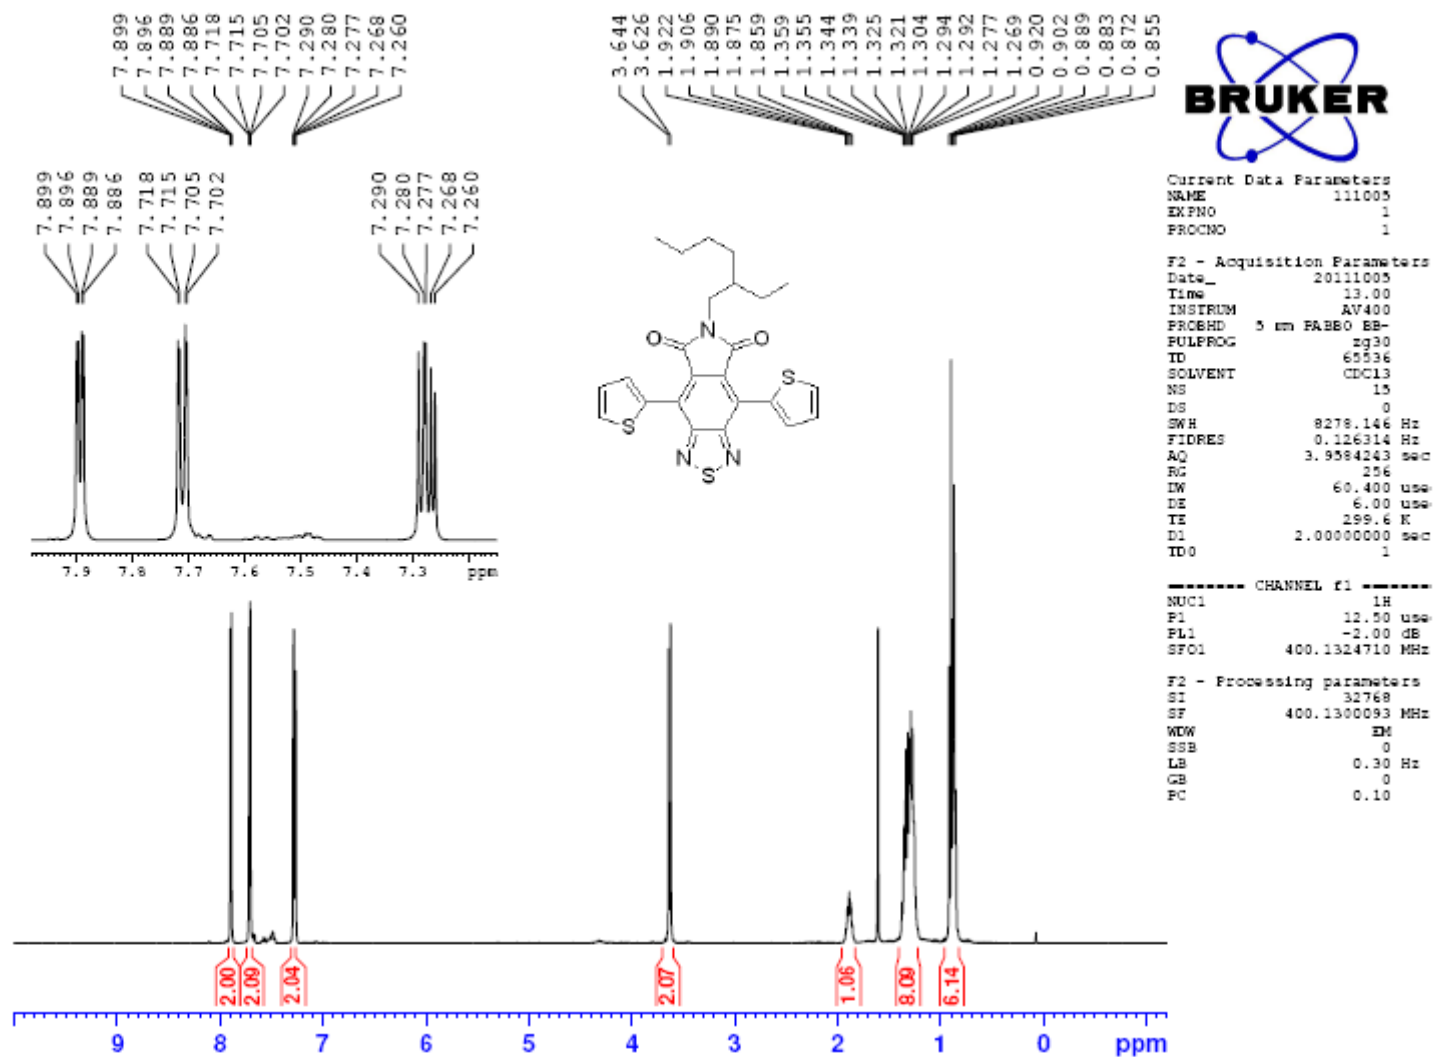

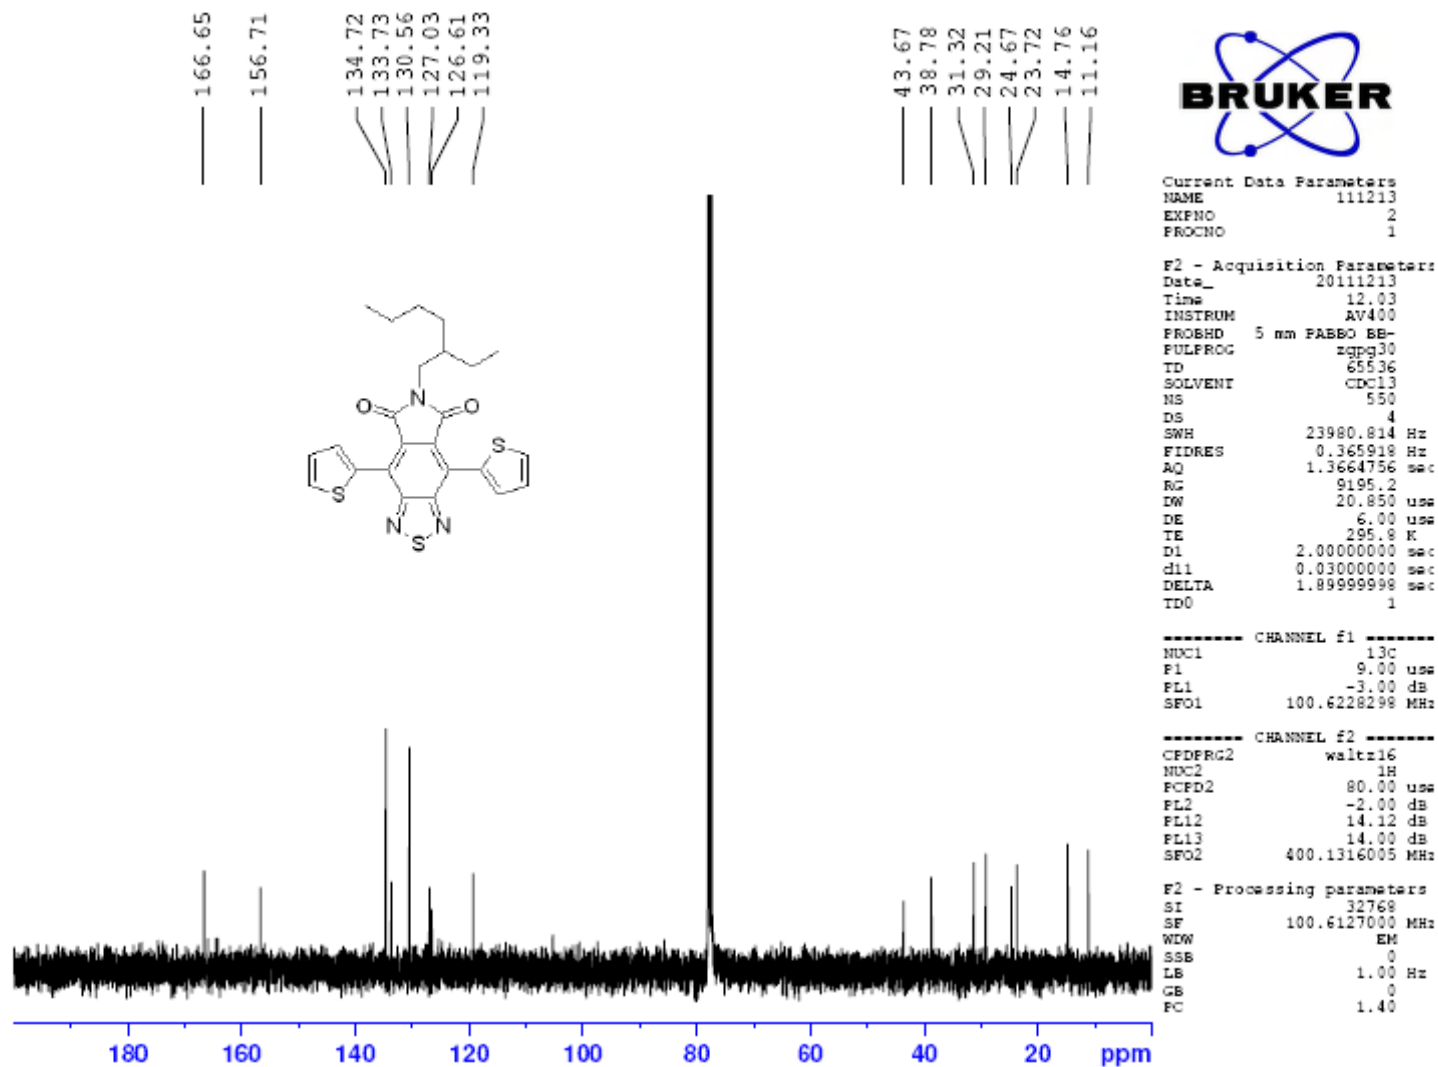

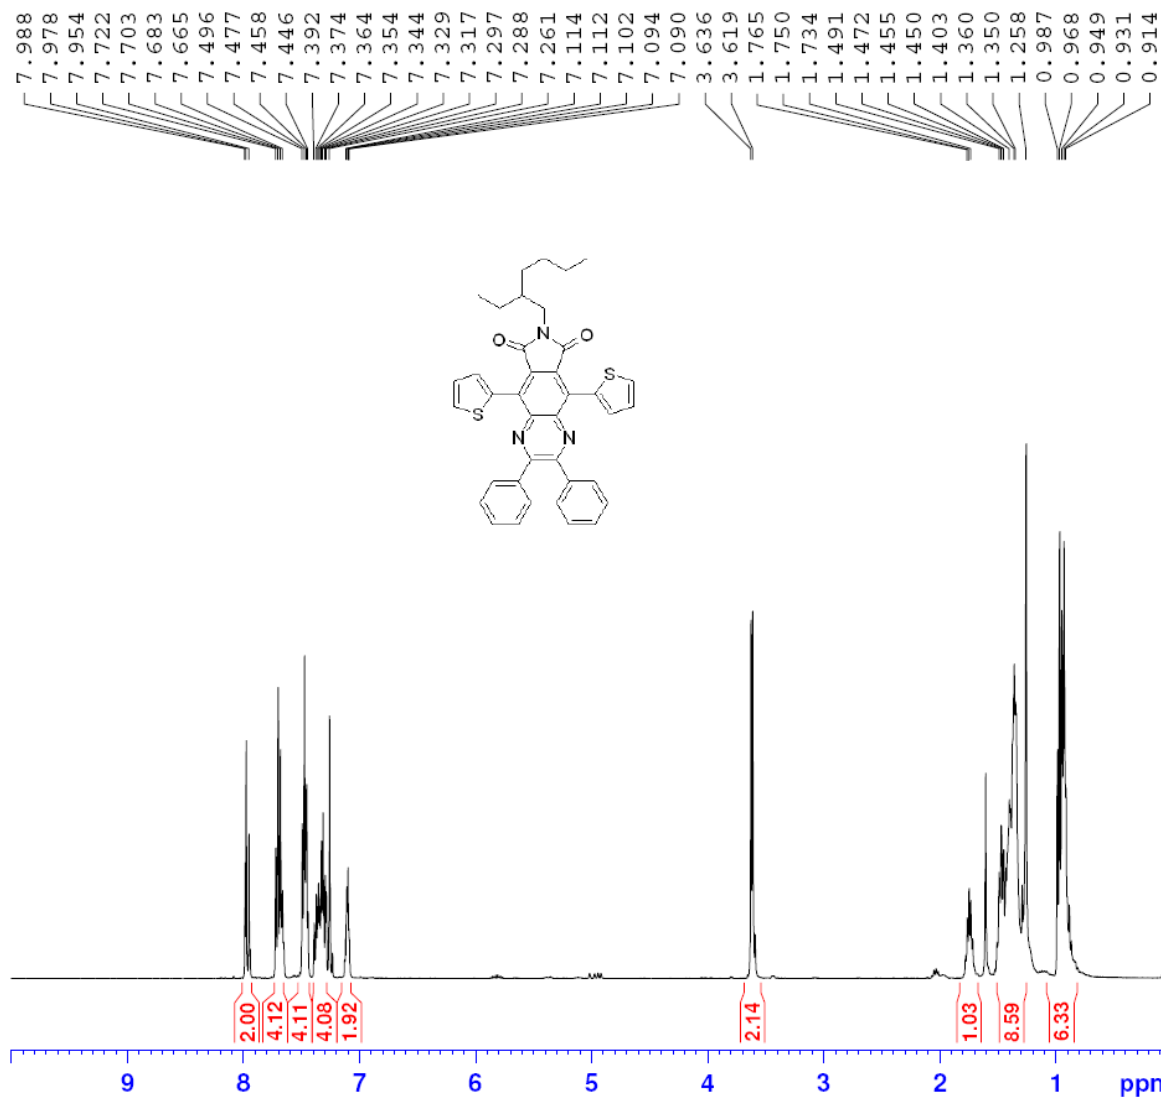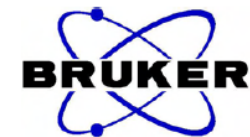

Current Data Parameters  
NAME 120514  
EXPNO 2  
PROCNO 1

F2 - Acquisition Parameters  
Date\_ 20120514  
Time 17.31  
INSTRUM AV400  
PROBHD 5 mm PABBO BB-  
PULPROG zg30  
TD 65536  
SOLVENT CDCl3  
NS 13  
DS 0  
SWH 8278.146 Hz  
FIDRES 0.126314 Hz  
AQ 3.9584243 sec  
RG 256  
DW 60.400 usec  
DE 6.00 usec  
TE 294.5 K  
D1 2.00000000 sec  
TDO 1

----- CHANNEL f1 -----  
NUC1 1H  
P1 12.50 usec  
PL1 -2.00 dB  
SFO1 400.1324710 MHz

F2 - Processing parameters  
SI 32768  
SF 400.1300092 MHz  
WDW EM  
SSB 0  
LB 0.30 Hz  
GB 0  
PC 1.00

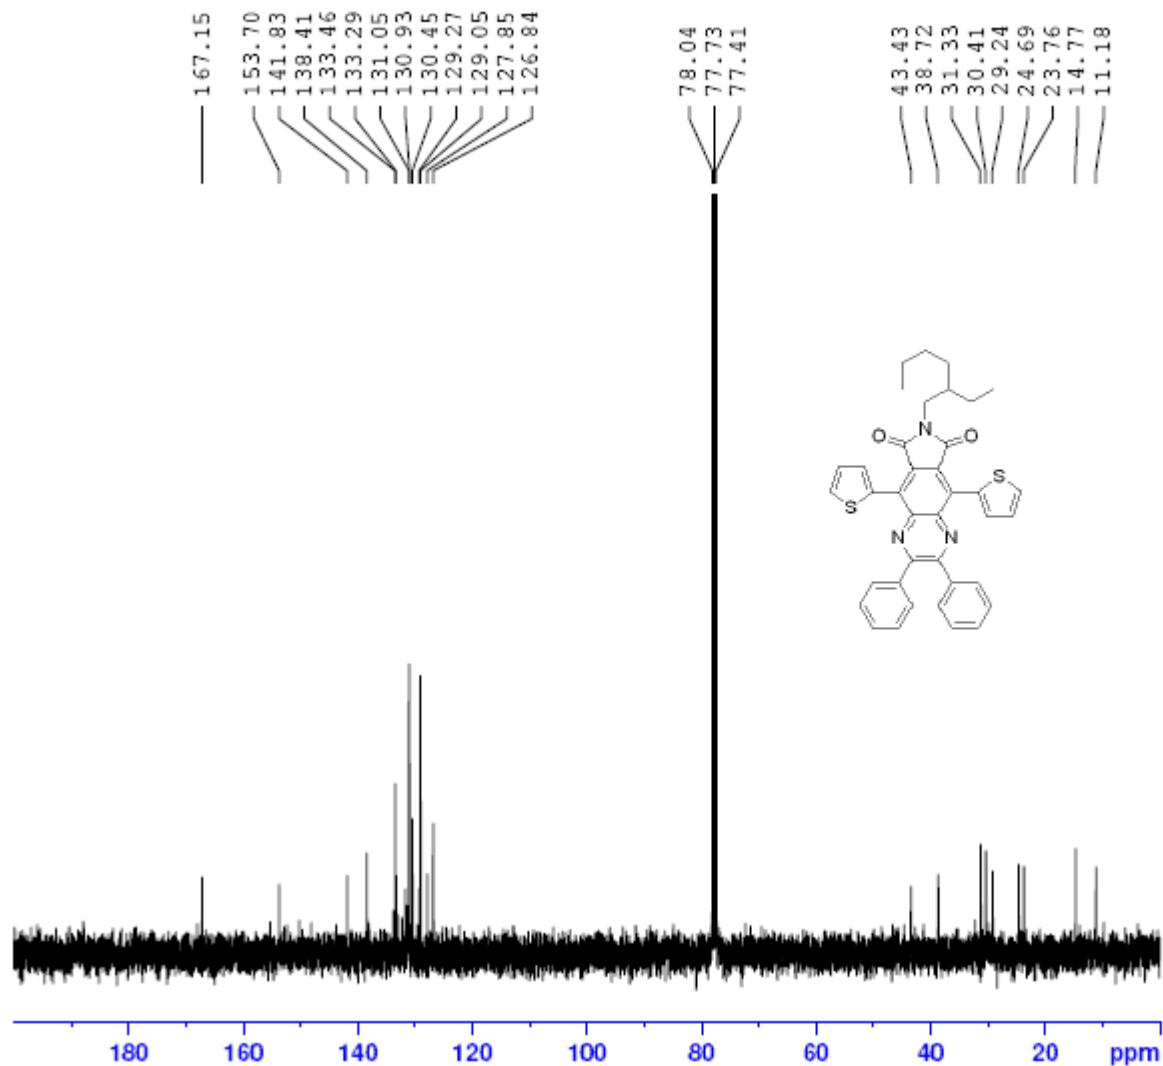

167.15  
153.70  
141.83  
138.41  
133.46  
133.29  
131.05  
130.93  
130.45  
129.27  
129.05  
127.85  
126.84

78.04  
77.73  
77.41

43.43  
38.72  
31.33  
30.41  
29.24  
24.69  
23.76  
14.77  
11.18

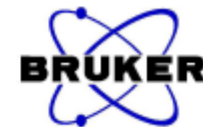

Current Data Parameters  
NAME 120528  
EXPNO 2  
PROCNO 1

F2 - Acquisition Parameters:  
Date\_ 20120528  
Time 13.09  
INSTRUM AV400  
PROBHD 5 mm F4BBO BB-  
PULPROG zgpg30  
TD 65536  
SOLVENT CDCl3  
NS 103  
DS 4  
SWH 23980.814 Hz  
FIDRES 0.365918 Hz  
AQ 1.3664756 sec  
RG 1448.2  
DW 20.850 usec  
DE 6.00 usec  
TE 295.7 K  
D1 2.00000000 sec  
d11 0.03000000 sec  
DELTA 1.89999998 sec  
TD0 1

----- CHANNEL f1 -----  
NUC1 13C  
P1 9.00 usec  
PL1 -3.00 dB  
SFO1 100.6228298 MHz

----- CHANNEL f2 -----  
CPDPRG2 waltz16  
NUC2 1H  
PCPD2 80.00 usec  
PL2 -2.00 dB  
PL12 14.12 dB  
PL13 14.00 dB  
SFO2 400.1316005 MHz

F2 - Processing parameters  
SI 32768  
SF 100.6127007 MHz  
WDW EM  
SSE 0  
LB 1.00 Hz  
GB 0  
PC 1.00



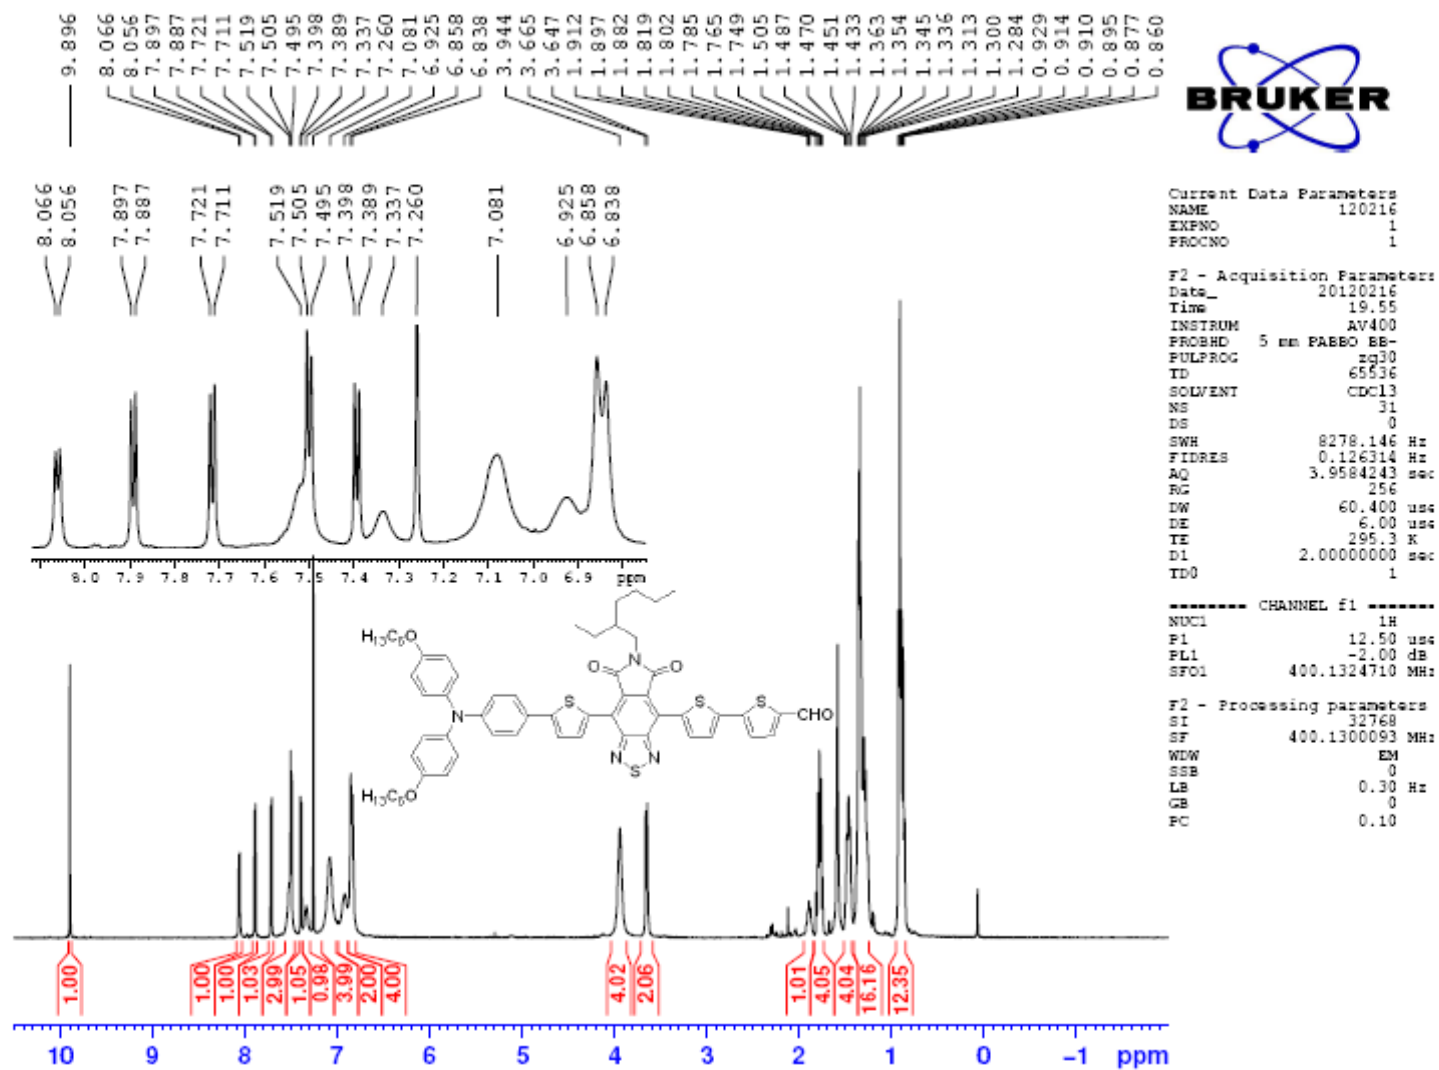

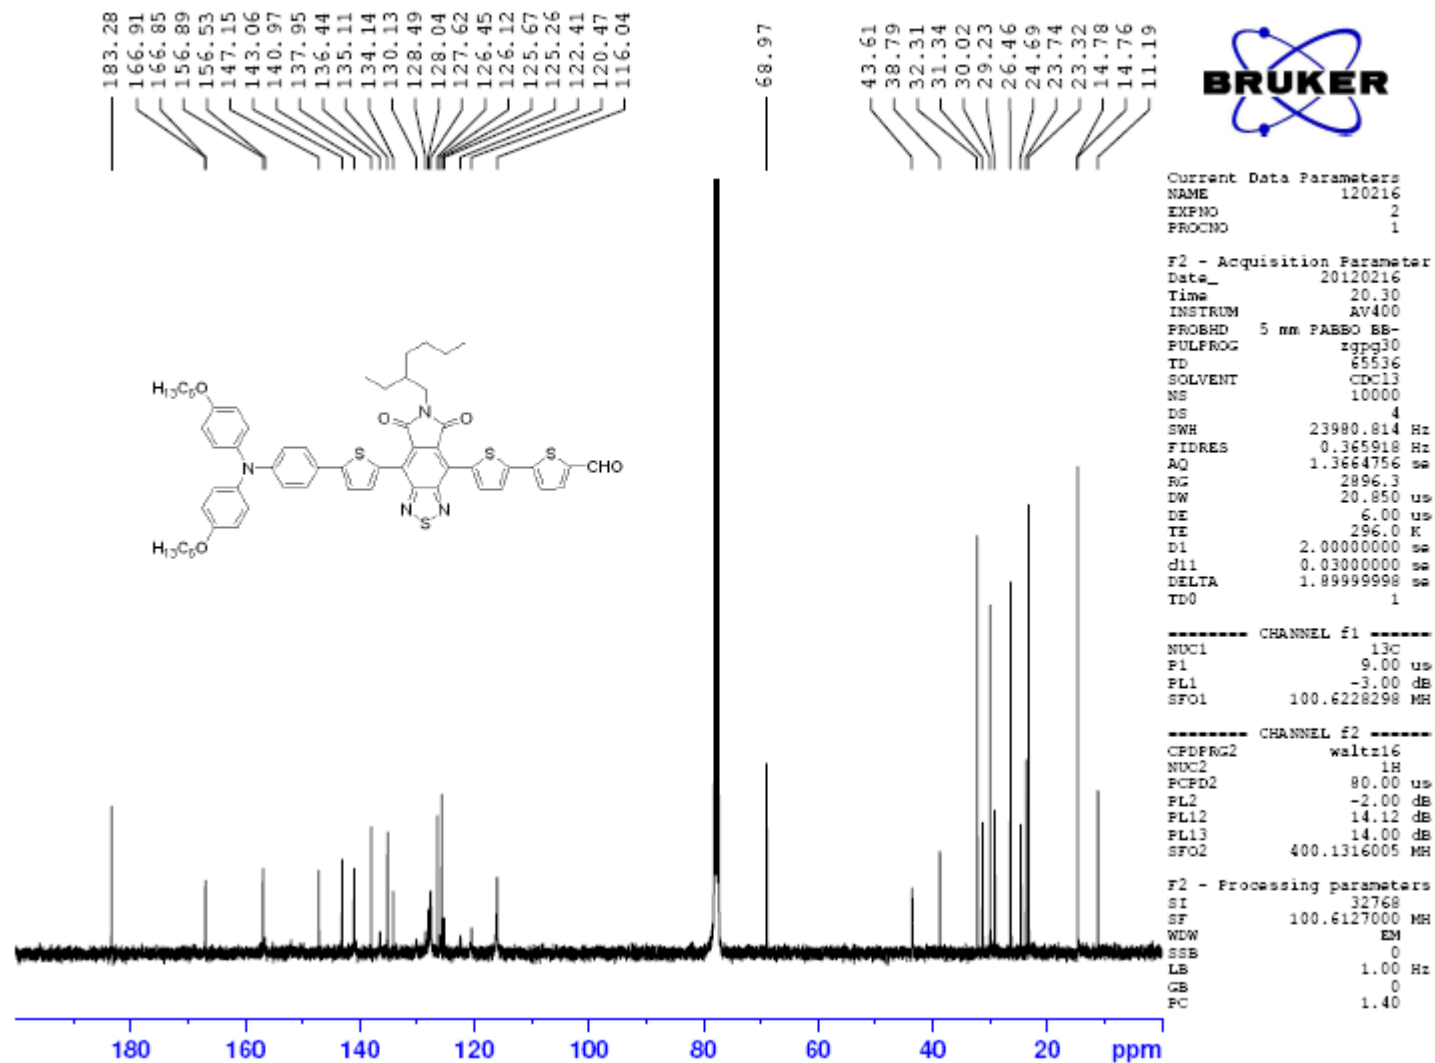

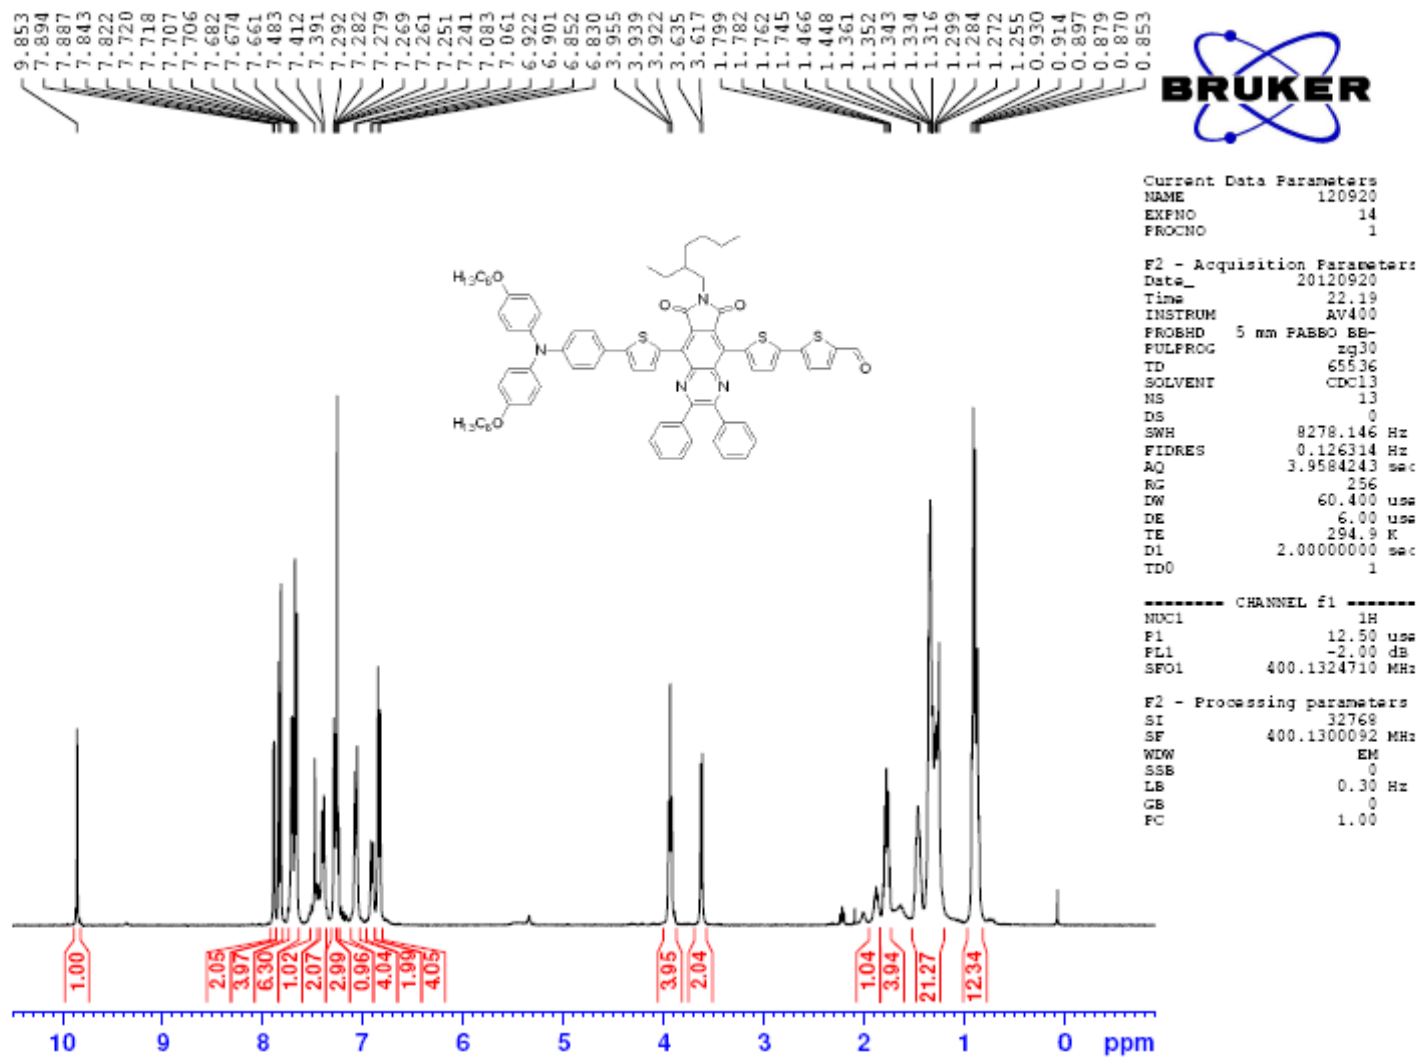

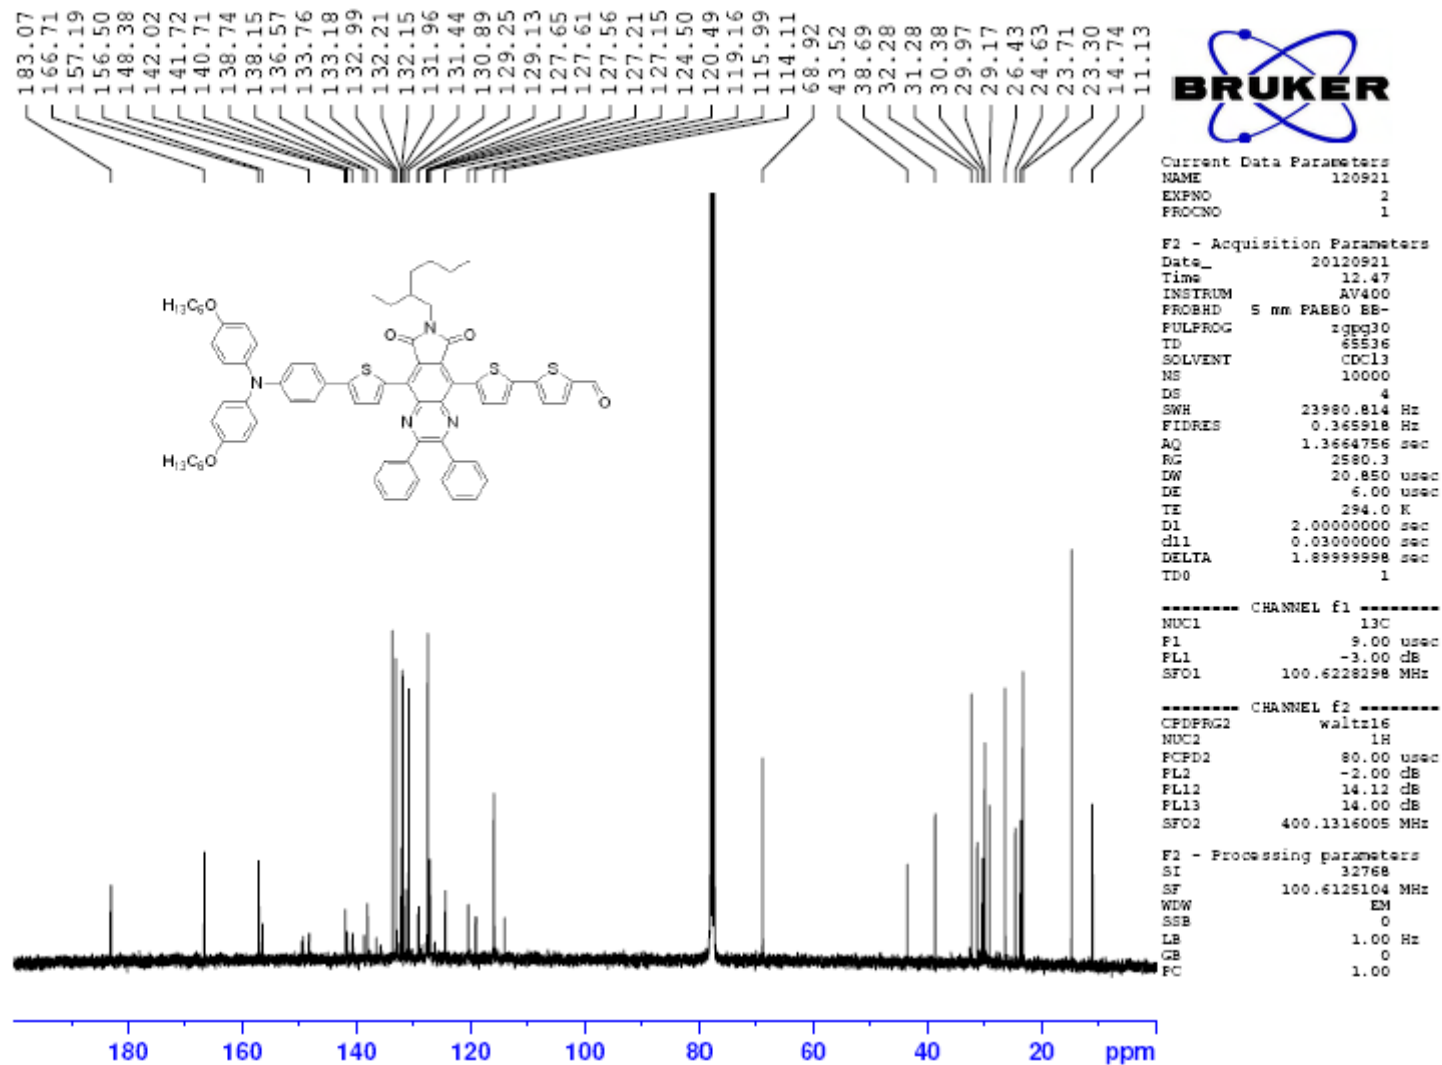

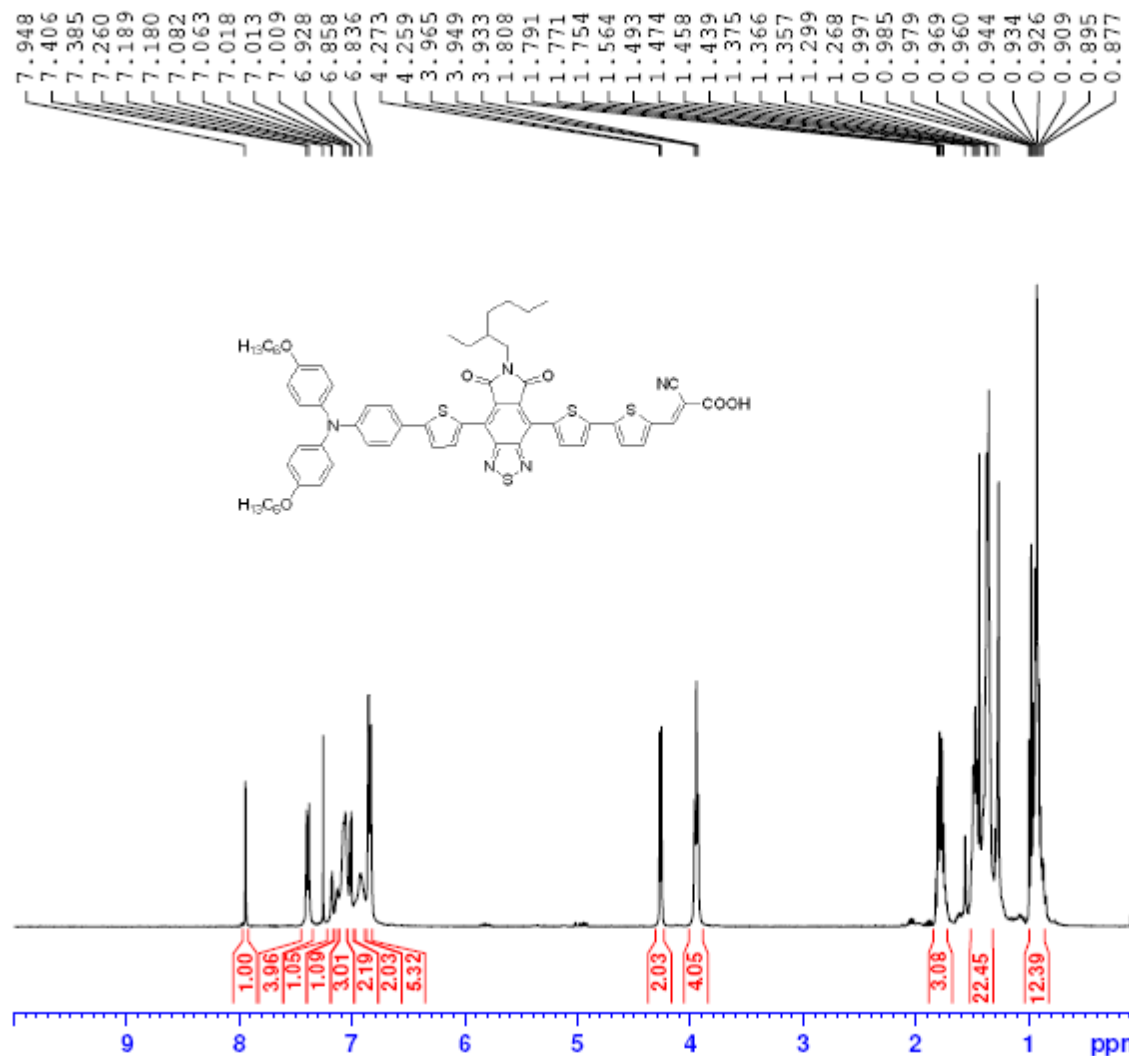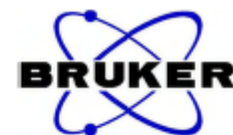

Current Data Parameters  
NAME 120817  
EXPNO 1  
PROCNO 1

F2 - Acquisition Parameters  
Date\_ 20120817  
Time 16.33  
INSTRUM AV400  
PROBHD 5 mm PABBO BB-  
PULPROG zg30  
TD 65536  
SOLVENT CDCl3  
NS 6  
DS 0  
SWH 8278.146 Hz  
FIDRES 0.126314 Hz  
AQ 3.9584243 sec  
RG 256  
DN 60.400 usec  
DE 6.00 usec  
TE 307.6 K  
D1 2.0000000 sec  
TD0 1

===== CHANNEL f1 =====  
NUC1 1H  
P1 12.50 usec  
PL1 -2.00 dB  
SFO1 400.1324710 MHz

F2 - Processing parameters  
SI 32768  
SF 400.1300092 MHz  
WDW EM  
SSB 0  
LB 0.30 Hz  
GB 0  
PC 10.00

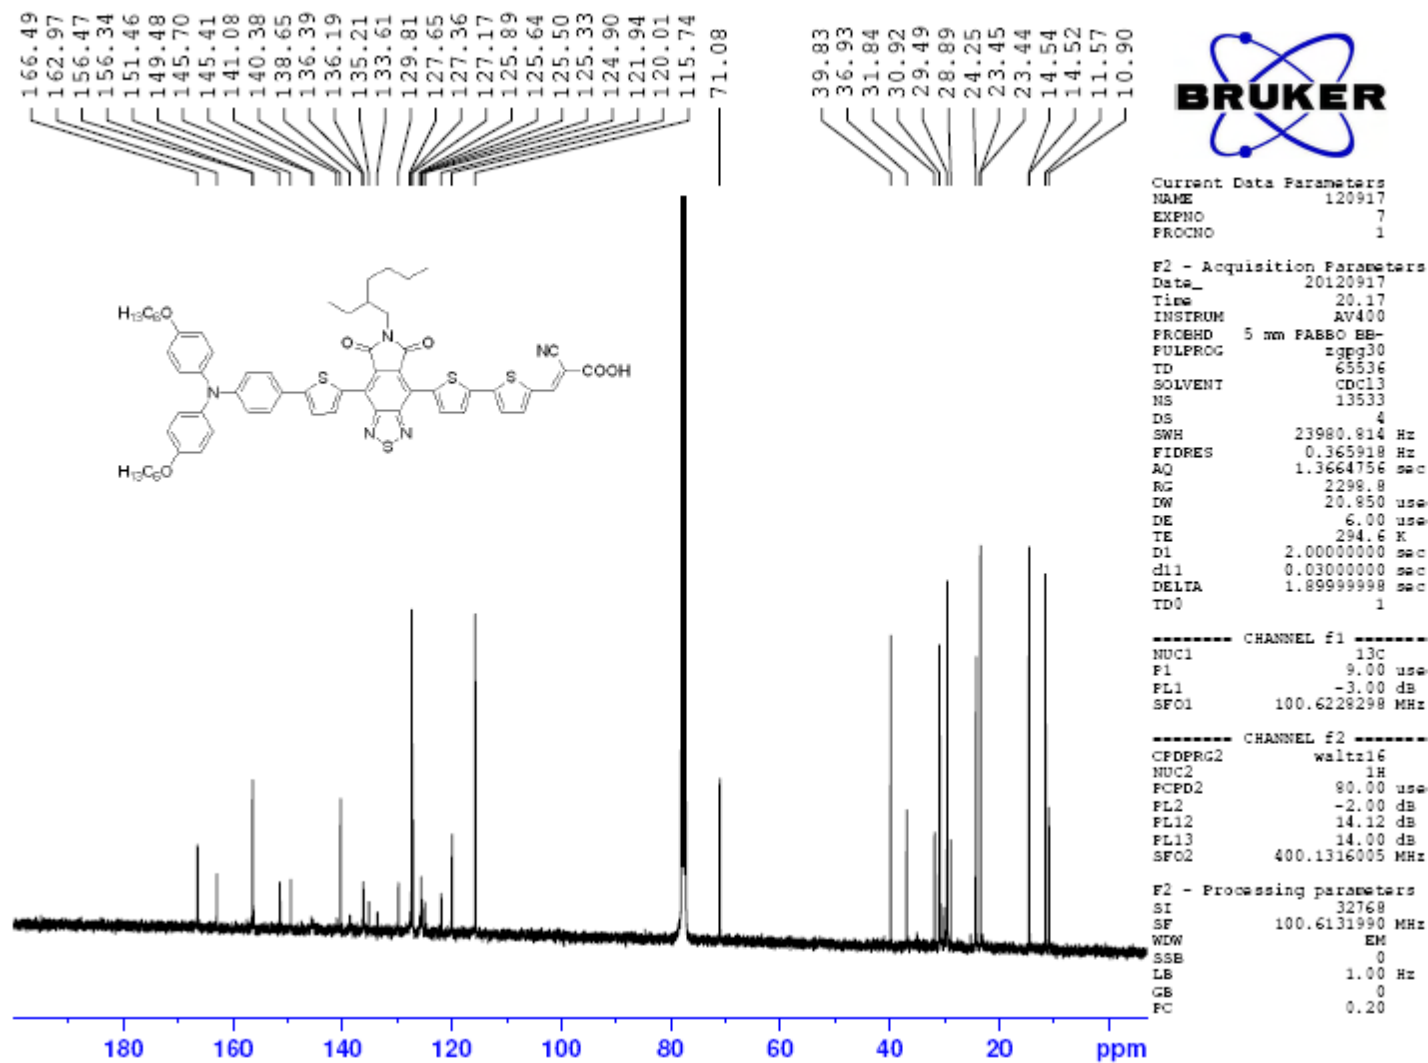

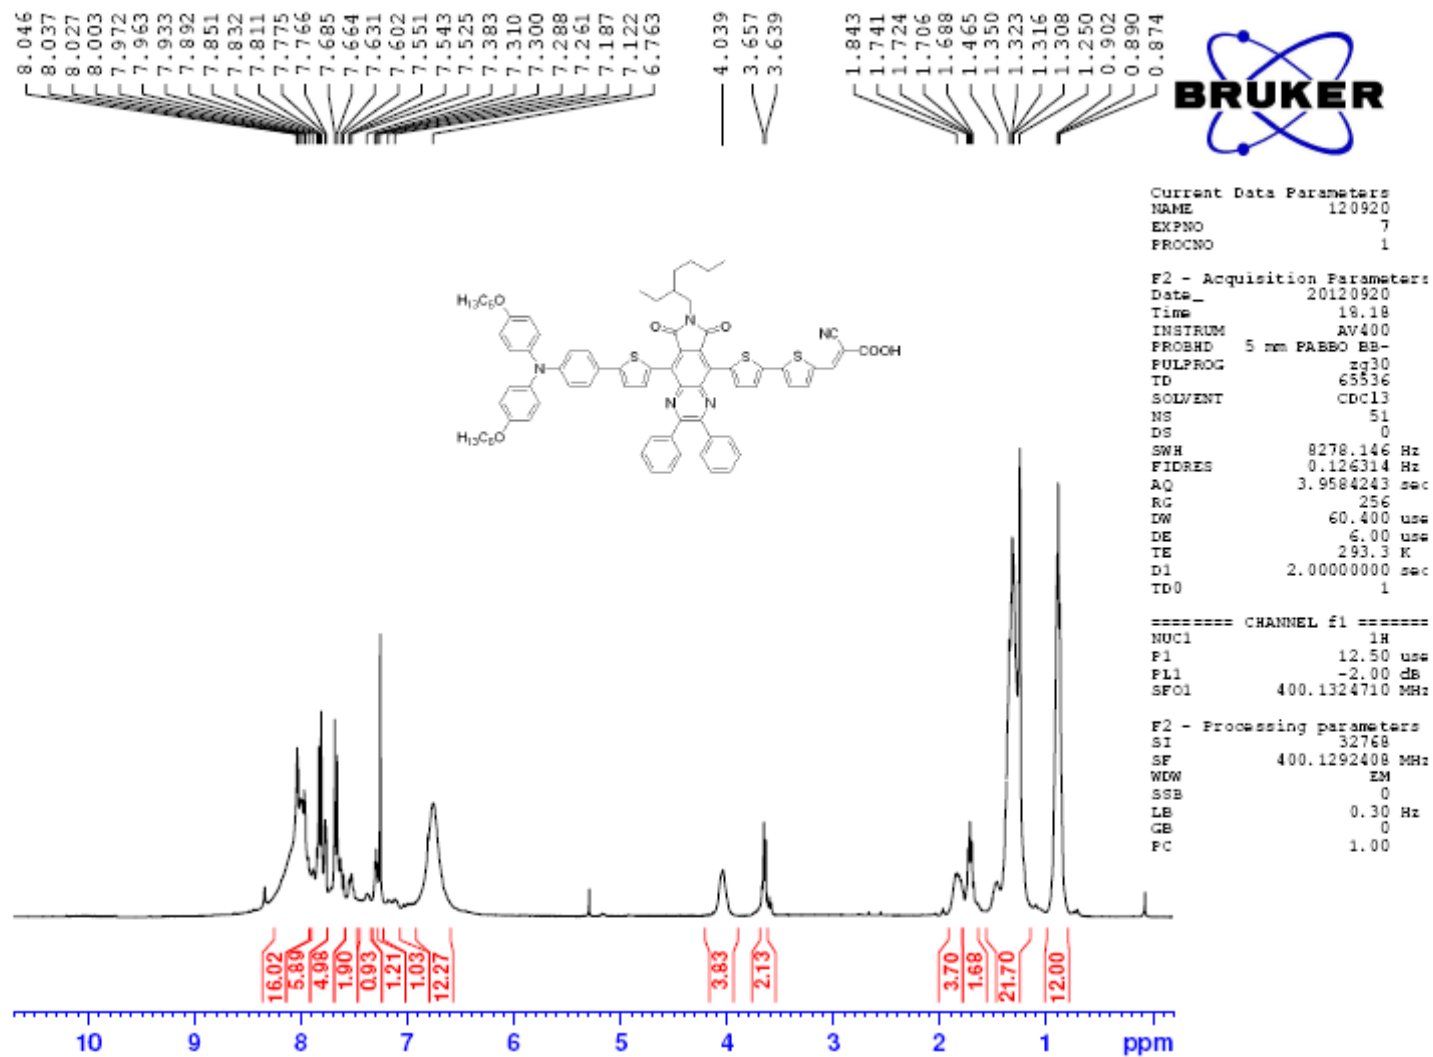

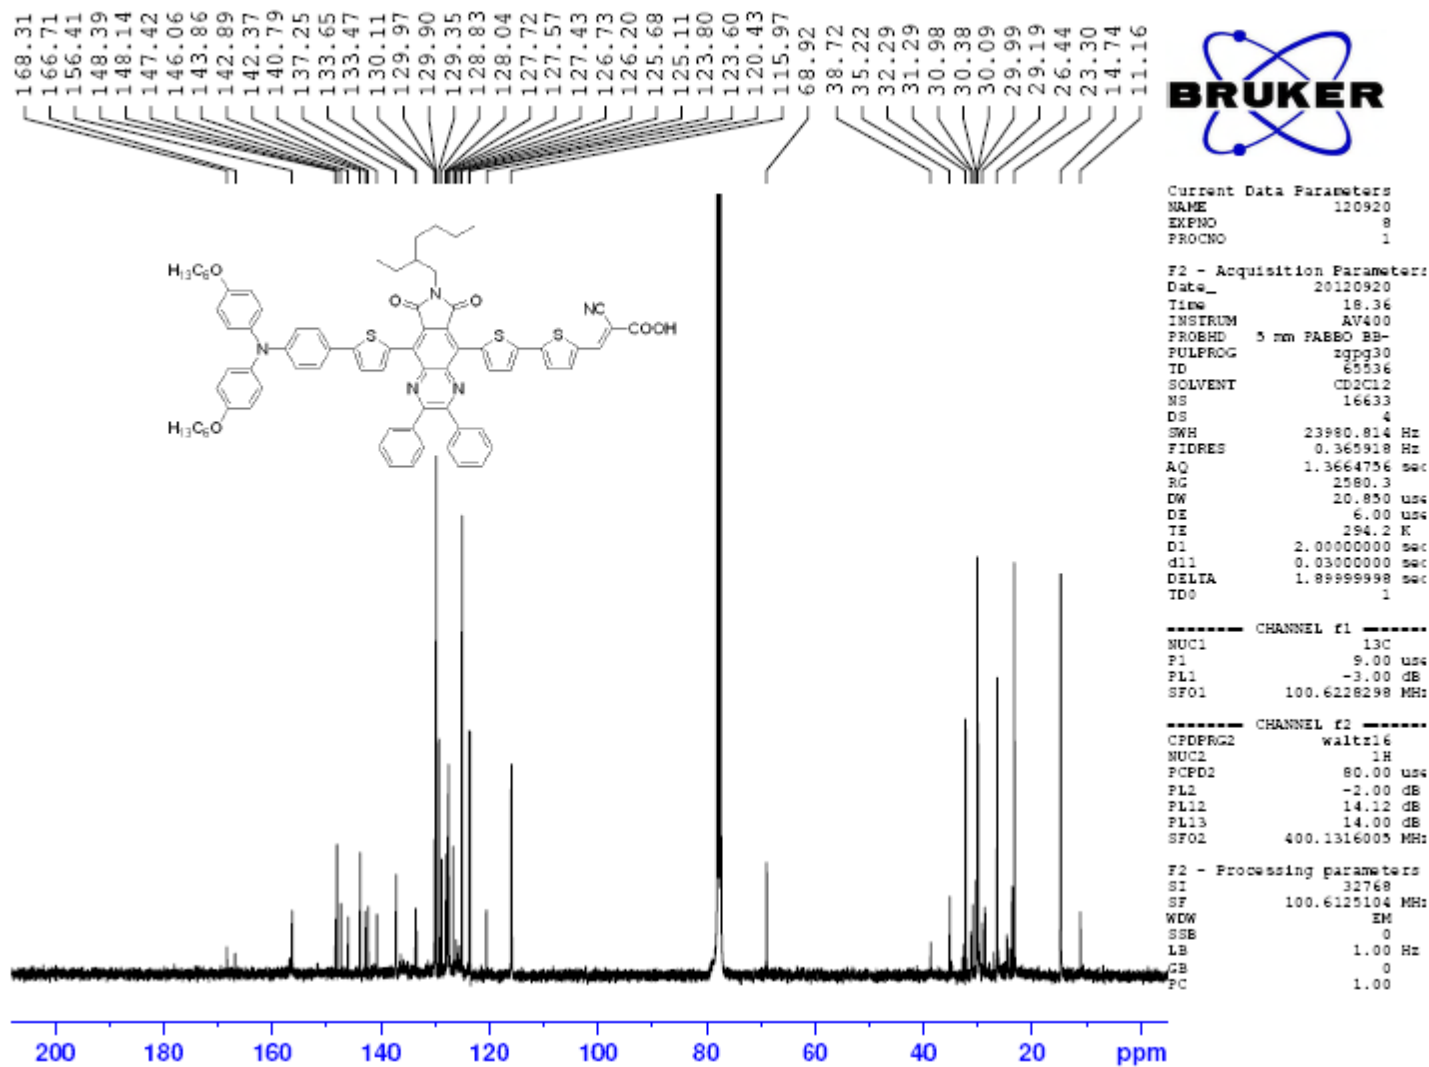

Supplement: c3cc00060e.pdf [file c3cc00060e.pdf]
